# Supplementary material for: The fabrication of a Co3O4/graphene oxide (GO)/polyacrylonitrile (PAN) nanofiber membrane for the degradation of Orange II by advanced oxidation technology
Source: Royal Society of Chemistry journal article supplement (doi:10.1039/c9ra06656j), 2019-01-01
Supplement: c9ra06656j1.pdf [file c9ra06656j1.pdf]

## Supporting

S1: Comparison table of metal oxide and graphene synergistic catalytic materials in recent years

| <b>meterial</b>                    | <b>Graphene type</b>   | <b>Degradation method</b> | <b>Radical species</b>          | <b>lighting need</b> | <b>References</b>                 |
|------------------------------------|------------------------|---------------------------|---------------------------------|----------------------|-----------------------------------|
| Fe <sub>2</sub> O <sub>3</sub>     | reduced graphene oxide | photocatalytic            | hydroxyl radical                | yes                  | (Pradhan, Padhi and Parida, 2013) |
| MgO                                | graphene oxide         | photocatalytic            | hydroxyl radical                | yes                  | (Arshad <i>et al.</i> , 2017)     |
| V <sub>2</sub> O <sub>5</sub>      | graphene               | photocatalytic            | oxide radicals/hydroxyl radical | yes                  | (Shanmugam <i>et al.</i> , 2015)  |
| TiO                                | graphene oxide         | photocatalytic            | oxide radicals/hydroxyl radical | yes                  | (Zhao <i>et al.</i> , 2012)       |
| NiO                                | graphene nanoplatelets | photocatalytic            | hydroxyl radical                | yes                  | (Arshad, Iqbal and Mansoor, 2017) |
| Mn <sub>3</sub> O <sub>4</sub>     | graphene oxide         | FENTON'S REAGENT          | hydroxyl radical                | no                   | (Li <i>et al.</i> , 2015)         |
| <b>Co<sub>3</sub>O<sub>4</sub></b> | <b>graphene oxide</b>  | <b>FENTON'S REAGENT</b>   | <b>Sulfate radical</b>          | <b>no</b>            | <b>(Shi <i>et al.</i>, 2012)</b>  |

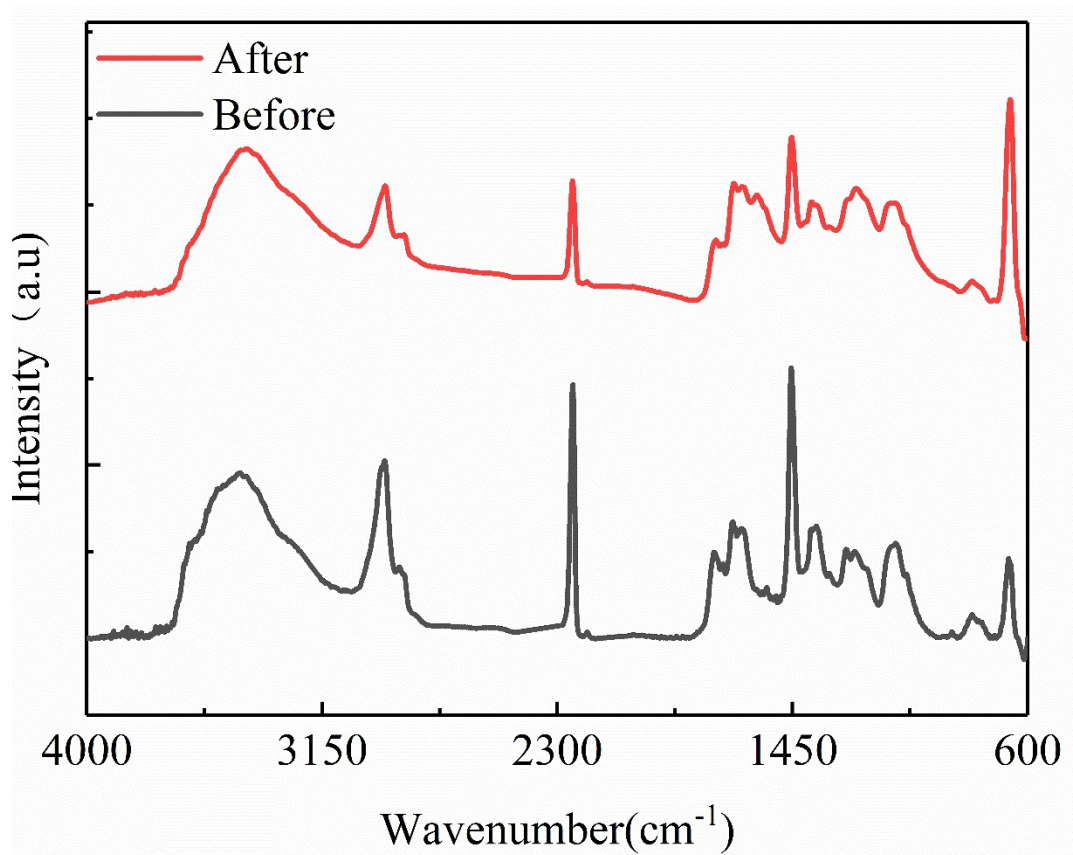

S 1: The result of spectroscopic characterization with membrane before and after degradation

## reference

1. Arshad, A. *et al.* (2017) 'Graphene nanoplatelets induced tailoring in photocatalytic activity and antibacterial characteristics of MgO/graphene nanoplatelets nanocomposites', *Journal of Applied Physics*, 121(2). doi: 10.1063/1.4972970.
2. Arshad, A., Iqbal, J. and Mansoor, Q. (2017) 'NiO-nanoflakes grafted graphene: An excellent photocatalyst and a novel nanomaterial for achieving complete pathogen control', *Nanoscale*. Royal Society of Chemistry, 9(42), pp. 16321–16328. doi: 10.1039/c7nr05756c.
3. Li, Y. *et al.* (2015) 'In situ fabrication of Mn<sub>3</sub>O<sub>4</sub> decorated graphene oxide as a synergistic catalyst for degradation of methylene blue', *Applied Catalysis B: Environmental*. Elsevier B.V., 162, pp. 268–274. doi: 10.1016/j.apcatb.2014.06.058.
4. Pradhan, G. K., Padhi, D. K. and Parida, K. M. (2013) 'Fabrication of  $\alpha$ -Fe<sub>2</sub>O<sub>3</sub> Nanorod/RGO composite: A novel hybrid photocatalyst for phenol degradation', *ACS Applied Materials and*

*Interfaces*, 5(18), pp. 9101–9110. doi: 10.1021/am402487h.

5. Shanmugam, M. *et al.* (2015) 'Enhanced Photocatalytic Performance of the Graphene-V2O5 Nanocomposite in the Degradation of Methylene Blue Dye under Direct Sunlight', *ACS Applied Materials and Interfaces*, 7(27), pp. 14905–14911. doi: 10.1021/acsami.5b02715.
6. Shi, P. *et al.* (2012) 'Applied Catalysis B : Environmental Co<sub>3</sub>O<sub>4</sub> nanocrystals on graphene oxide as a synergistic catalyst for degradation of Orange II in water by advanced oxidation technology based on sulfate radicals', *Applied Catalysis B, Environmental*. Elsevier B.V., 123–124, pp. 265–272. doi: 10.1016/j.apcatb.2012.04.043.
7. Zhao, D. *et al.* (2012) 'Enhanced photocatalytic degradation of methylene blue under visible irradiation on graphene@TiO<sub>2</sub> dyade structure', *Applied Catalysis B: Environmental*. Elsevier B.V., 111–112, pp. 303–308. doi: 10.1016/j.apcatb.2011.10.012.
